# Supplementary material for: First hyperpolarizabilities of Pt(4-ethynylbenzo-15-crown-5)2(bpy) derivatives with the complexation of mono-cations (Li+, Na+, K+) and di-cations (Mg2+, Ca2+): development of a cation detector
Source: Royal Society of Chemistry journal article supplement (doi:10.1039/c7ra04919f), 2017-01-01
Supplement: c7ra04919f1.pdf [file c7ra04919f1.pdf]

## Electronic supplementary information for

### **First hyperpolarizabilities of Pt(4-ethynylbenzo-15-crown-5)<sub>2</sub>(bpy) derivatives with the complexation of mono-cations (Li<sup>+</sup>, Na<sup>+</sup>, K<sup>+</sup>) and di-cations (Mg<sup>2+</sup>, Ca<sup>2+</sup>): the development as cation detector**

Hai-Ling Yu,<sup>a,\*</sup> Wen-Yong Wang,<sup>b</sup> Bo Hong,<sup>a</sup> Yan-Ling Si,<sup>a</sup> Tian-Liang Ma,<sup>a</sup> and  
Ran Zheng<sup>a</sup>

*<sup>a</sup>College of Resources and Environmental Science, Jilin Agricultural University, Changchun 130118, People's Republic of China*

*<sup>b</sup>JiangSu XinHai Senior High School, Lianyungang City 222000, Jangsu, People's Republic of China*

**Table S1** NPA charge distribution for the fragments (F1 – F8) of compounds **L** and its metal

\*Corresponding Author. E-mail addresses: jlayu@163.com (H. L. Yu)

cation derivatives computed at B3LYP/6-31G\*\*/LanL2DZ level

| Compound         | L      | L*(Li <sup>+</sup> ) <sub>2</sub> | L*(Na <sup>+</sup> ) <sub>2</sub> | L*(K <sup>+</sup> ) <sub>2</sub> | L*(Mg <sup>2+</sup> ) <sub>2</sub> | L*(Ca <sup>2+</sup> ) <sub>2</sub> |
|------------------|--------|-----------------------------------|-----------------------------------|----------------------------------|------------------------------------|------------------------------------|
| M <sup>+2+</sup> | —      | 1.499                             | 1.535                             | 1.689                            | 3.249                              | 3.425                              |
| S1               | -0.427 | -0.299                            | -0.316                            | -0.393                           | -0.294                             | -0.375                             |
| S2               | -0.427 | -0.299                            | -0.316                            | -0.394                           | -0.294                             | -0.375                             |
| S3               | 0.384  | 0.456                             | 0.455                             | 0.457                            | 0.518                              | 0.513                              |
| S4               | 0.385  | 0.456                             | 0.454                             | 0.457                            | 0.518                              | 0.513                              |
| S5               | -0.296 | -0.286                            | -0.285                            | -0.285                           | -0.271                             | -0.280                             |
| S6               | -0.296 | -0.286                            | -0.285                            | -0.285                           | -0.271                             | -0.271                             |
| S7               | 0.303  | 0.322                             | 0.322                             | 0.322                            | 0.345                              | 0.344                              |
| S8               | 0.374  | 0.437                             | 0.436                             | 0.433                            | 0.501                              | 0.498                              |

**Table S2** First hyperpolarizability and its corresponding important tensorial component (10<sup>-30</sup> esu) calculated at the CAM-B3LYP level with the ultrafine integration grid.

|               | L    | L*(Li <sup>+</sup> ) <sub>2</sub> | L*(Na <sup>+</sup> ) <sub>2</sub> | L*(K <sup>+</sup> ) <sub>2</sub> | L*(Mg <sup>2+</sup> ) <sub>2</sub> | L*(Ca <sup>2+</sup> ) <sub>2</sub> |
|---------------|------|-----------------------------------|-----------------------------------|----------------------------------|------------------------------------|------------------------------------|
| $\beta_{xxx}$ | 3.3  | 0.2                               | -0.6                              | -0.6                             | -0.0                               | 0.0                                |
| $\beta_{xyy}$ | 17.6 | -4.5                              | -4.2                              | -4.8                             | -19.7                              | -21.9                              |
| $\beta_{xyx}$ | 2.3  | -0.3                              | 0.1                               | -0.0                             | -0.0                               | -0.0                               |
| $\beta_{yyy}$ | 54.1 | 15.7                              | 16.0                              | 15.2                             | 2.2                                | 1.7                                |
| $\beta_{xzz}$ | 0.0  | -0.0                              | -0.0                              | -0.0                             | -0.0                               | 0.0                                |
| $\beta_{yzz}$ | 1.2  | 0.6                               | 0.8                               | 0.6                              | 0.3                                | 0.1                                |
| $\beta_x$     | 5.7  | -0.2                              | -0.4                              | -0.6                             | -0.0                               | 0.0                                |
| $\beta_y$     | 72.9 | 11.8                              | 12.6                              | 11.0                             | -17.2                              | -20.1                              |
| $\beta_z$     | -0.5 | 1.7                               | 0.2                               | -0.4                             | 2.5                                | 2.3                                |

|               |      |      |      |      |      |      |
|---------------|------|------|------|------|------|------|
| $\beta_{tot}$ | 73.1 | 11.9 | 12.6 | 11.0 | 17.4 | 20.2 |
|---------------|------|------|------|------|------|------|

**Table S3** First hyperpolarizability and its corresponding important tensorial component ( $10^{-30}$  esu) calculated at the CAM-B3LYP level with the superfine integration grid.

|               | L    | L*(Li <sup>+</sup> ) <sub>2</sub> | L*(Na <sup>+</sup> ) <sub>2</sub> | L*(K <sup>+</sup> ) <sub>2</sub> | L*(Mg <sup>2+</sup> ) <sub>2</sub> | L*(Ca <sup>2+</sup> ) <sub>2</sub> |
|---------------|------|-----------------------------------|-----------------------------------|----------------------------------|------------------------------------|------------------------------------|
| $\beta_{xxx}$ | 3.3  | 0.2                               | -0.6                              | -0.6                             | -0.0                               | 0.0                                |
| $\beta_{xyy}$ | 17.6 | -4.5                              | -4.2                              | -4.8                             | -19.7                              | -21.9                              |
| $\beta_{xyx}$ | 2.3  | -0.3                              | 0.1                               | -0.0                             | -0.0                               | -0.0                               |
| $\beta_{yyy}$ | 54.1 | 15.7                              | 16.0                              | 15.2                             | 2.2                                | 1.7                                |
| $\beta_{zzz}$ | 0.0  | -0.0                              | -0.0                              | -0.0                             | -0.0                               | 0.0                                |
| $\beta_{yzz}$ | 1.2  | 0.7                               | 0.8                               | 0.6                              | 0.3                                | 0.1                                |
| $\beta_x$     | 5.7  | -0.2                              | -0.4                              | -0.6                             | -0.0                               | 0.0                                |
| $\beta_y$     | 72.9 | 11.8                              | 12.6                              | 11.0                             | -17.2                              | -20.1                              |
| $\beta_z$     | -0.5 | 1.7                               | 0.2                               | -0.4                             | 2.5                                | 2.3                                |
| $\beta_{tot}$ | 73.1 | 11.9                              | 12.6                              | 11.0                             | 17.4                               | 20.2                               |

**Table S4** First hyperpolarizability and its corresponding important tensorial component( $10^{-30}$  esu) calculated at the LC-BLYP level.

|               | L    | L*(Li <sup>+</sup> ) <sub>2</sub> | L*(Na <sup>+</sup> ) <sub>2</sub> | L*(K <sup>+</sup> ) <sub>2</sub> | L*(Mg <sup>2+</sup> ) <sub>2</sub> | L*(Ca <sup>2+</sup> ) <sub>2</sub> |
|---------------|------|-----------------------------------|-----------------------------------|----------------------------------|------------------------------------|------------------------------------|
| $\beta_{xxx}$ | 1.0  | 0.2                               | -0.5                              | -0.4                             | -0.0                               | 0.0                                |
| $\beta_{xyy}$ | 5.2  | -5.3                              | -5.2                              | -5.8                             | -16.4                              | -17.9                              |
| $\beta_{xyx}$ | 1.0  | -0.2                              | 0.3                               | 0.3                              | -0.0                               | -0.0                               |
| $\beta_{yyy}$ | 23.4 | 7.4                               | 7.5                               | 6.9                              | -1.5                               | -1.7                               |
| $\beta_{xzz}$ | -0.0 | -0.0                              | -0.0                              | -0.0                             | -0.0                               | 0.0                                |
| $\beta_{yzz}$ | 0.8  | 0.7                               | 0.8                               | 0.7                              | 0.4                                | 0.2                                |
| $\beta_x$     | 2.1  | -0.0                              | -0.1                              | -0.2                             | -0.0                               | 0.0                                |
| $\beta_y$     | 29.4 | 2.9                               | 3.1                               | 1.8                              | -17.5                              | -19.3                              |
| $\beta_z$     | -0.1 | 1.5                               | 1.2                               | 0.8                              | 2.5                                | 2.4                                |
| $\beta_{tot}$ | 29.5 | 3.3                               | 3.3                               | 2.0                              | 17.7                               | 19.5                               |

**Table S5** First hyperpolarizability and its corresponding important tensorial component( $10^{-30}$  esu) calculated at the M06-2X level.

|               | L    | L*(Li <sup>+</sup> ) <sub>2</sub> | L*(Na <sup>+</sup> ) <sub>2</sub> | L*(K <sup>+</sup> ) <sub>2</sub> | L*(Mg <sup>2+</sup> ) <sub>2</sub> | L*(Ca <sup>2+</sup> ) <sub>2</sub> |
|---------------|------|-----------------------------------|-----------------------------------|----------------------------------|------------------------------------|------------------------------------|
| $\beta_{xxx}$ | 2.9  | 0.2                               | -0.6                              | -0.6                             | -0.0                               | 0.0                                |
| $\beta_{xyy}$ | 15.5 | -5.0                              | -4.7                              | -5.3                             | -18.8                              | -20.9                              |
| $\beta_{xyx}$ | 2.1  | -0.3                              | 0.1                               | -0.0                             | -0.0                               | -0.0                               |
| $\beta_{yyy}$ | 47.7 | 11.7                              | 12.2                              | 11.4                             | -0.4                               | -0.8                               |
| $\beta_{xzz}$ | 0.0  | -0.0                              | -0.0                              | -0.0                             | -0.0                               | 0.0                                |
| $\beta_{yzz}$ | 1.3  | 0.6                               | 0.8                               | 0.6                              | 0.2                                | 0.0                                |

---

|               |      |      |      |      |       |       |
|---------------|------|------|------|------|-------|-------|
| $\beta_x$     | 5.1  | -0.1 | -0.5 | -0.6 | -0.0  | 0.0   |
| $\beta_y$     | 64.5 | 7.3  | 8.3  | 6.7  | -19.0 | -21.6 |
| $\beta_z$     | -0.5 | 1.6  | 0.5  | -0.1 | 2.2   | 2.1   |
| $\beta_{tot}$ | 64.7 | 7.5  | 8.3  | 6.7  | 19.2  | 21.7  |

---

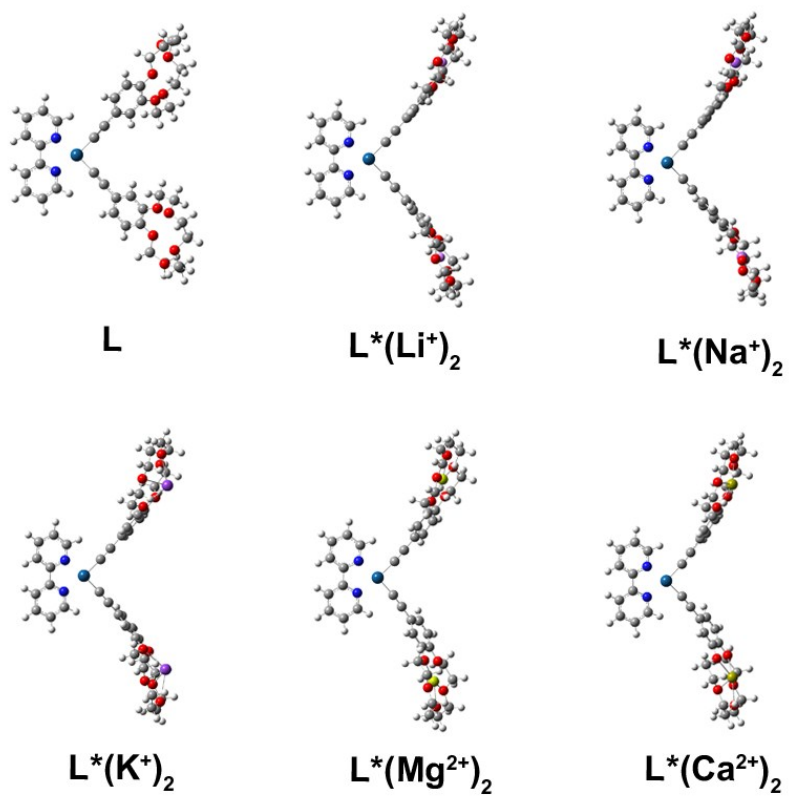

**Fig. S1** Geometrical structures of **L** and its cation derivatives

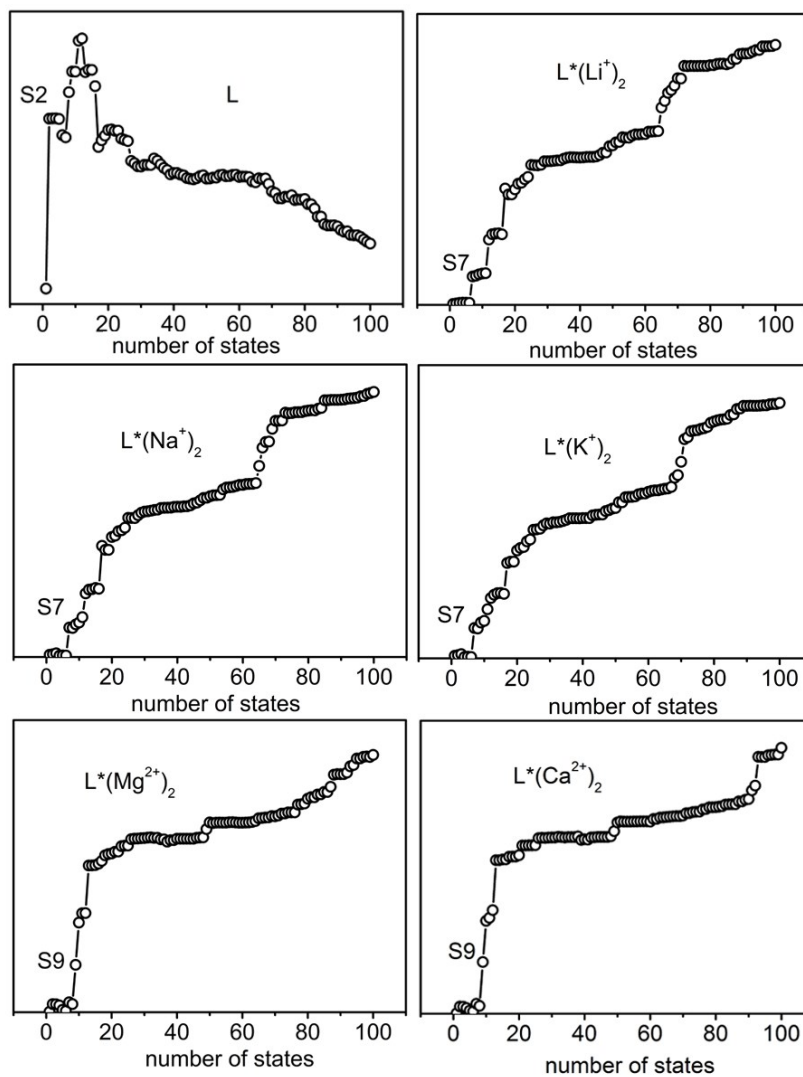

**Fig.S2** First hyperpolarizabilities obtained by SOS method with 100 states.
